# Supplementary material for: Role of polyunsaturated phospholipids in liquid-ordered and liquid-disordered phases
Source: Royal Society of Chemistry journal article supplement (doi:10.1039/d1ra02692e), 2021-01-01
Supplement: d1ra02692e1.pdf [file d1ra02692e1.pdf]

Supplementary information for

Role of polyunsaturated phospholipids in liquid-ordered and liquid-disordered phases

Jing Yang,<sup>\*1</sup> Jianyu Jin,<sup>1</sup> and Shibeni Li<sup>\*2</sup>

1. College of Education, Wenzhou University, Wenzhou, Zhejiang 325035, China.

Email: yangjing@wzu.edu.cn

2. Department of Physics, Wenzhou University, Wenzhou, Zhejiang 325035, China.

Email: shibenli@wzu.edu.cn

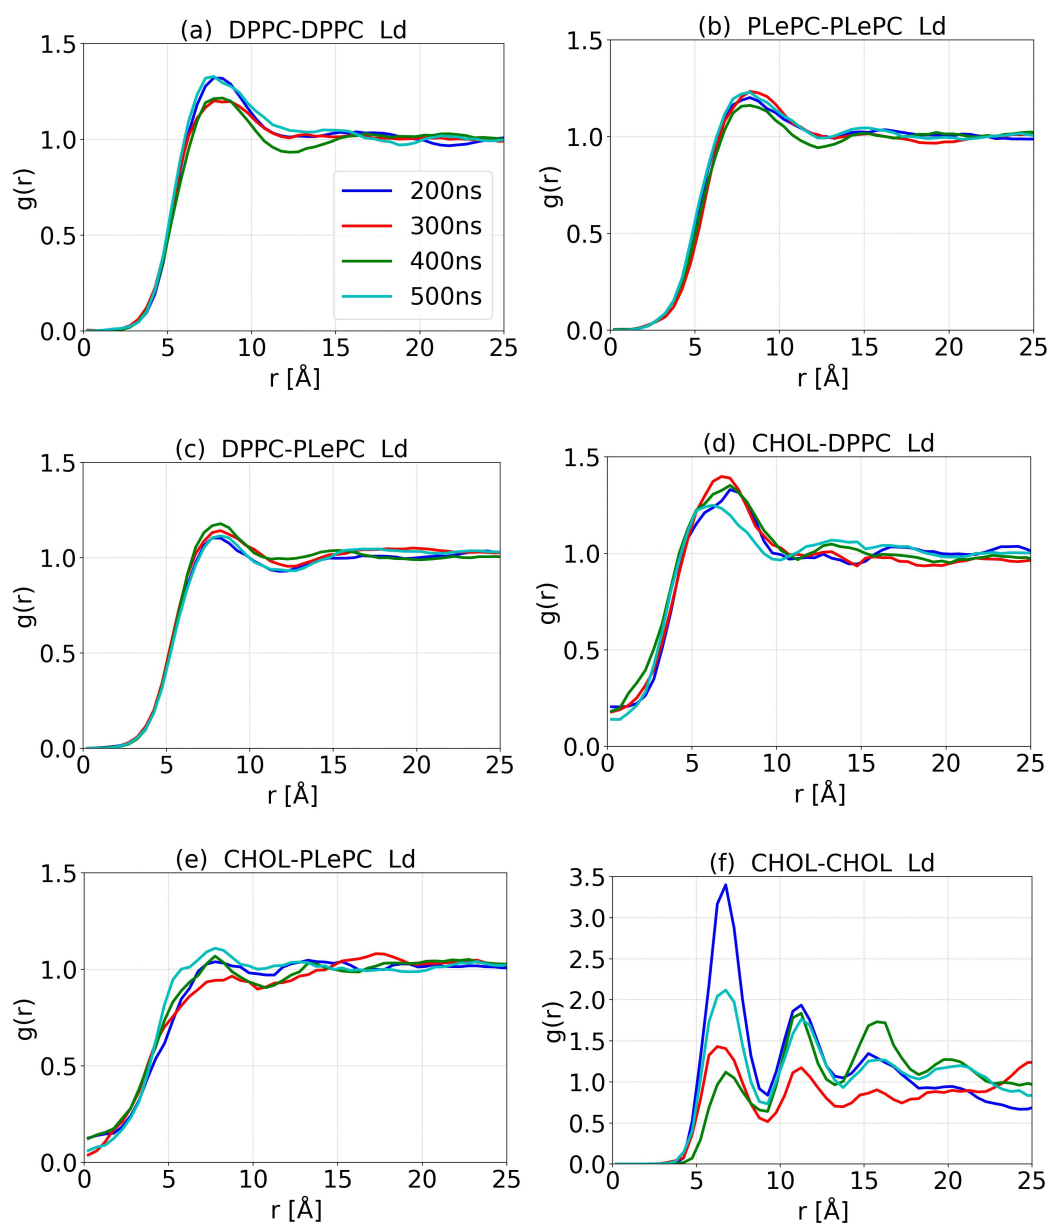

Figure S1: Lateral radial pair distribution function  $g(r)$  for DPPC/PLePC/CHOL mixtures in the Ld phase calculated from every 100 ns time interval of the 400 ns production run.

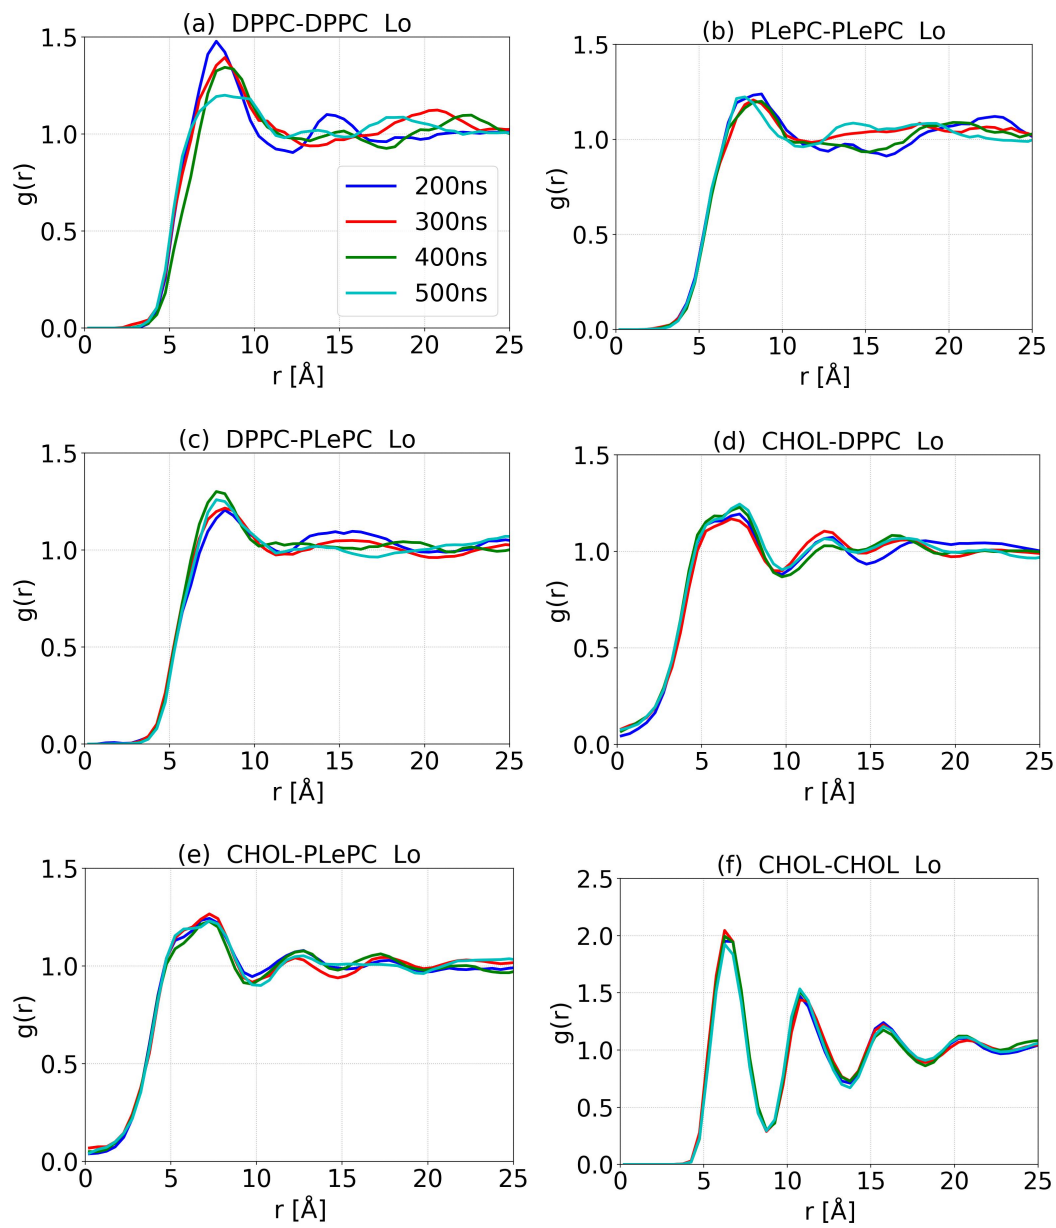

Figure S2: Lateral radial pair distribution function  $g(r)$  for DPPC/PLePC/CHOL mixtures in the Lo phase calculated from every 100 ns time interval of the 400 ns production run.
